# Supplementary material for: An effective non-equivalent ion exchange method for building an advanced Z-scheme WO3/Bi2WO6 photocatalyst
Source: Royal Society of Chemistry journal article supplement (doi:10.1039/d1nj03770f), 2021-01-01
Supplement: d1nj03770f1.pdf [file d1nj03770f1.pdf]

An effective general method for building advanced Z-scheme  
photocatalyst: case of  $\text{WO}_3/\text{Bi}_2\text{WO}_6$

Yiliang Shao, Xingzhi Jin, Chunlei Li, Yi Zheng\*

School of Petrochemical Engineering, Lanzhou University of Technology, Lanzhou  
730050, PR China

\*Corresponding author:

Yi Zheng: 18153972832;

E-mail address: wind\_2000\_love@163.com

## **Experimental part**

### **1. Materials**

Sodium tungstate dihydrate, nitric acid and rhodamine B were purchased from Sinopharm Chemical Reagent Co., Ltd, Lead. Bismuth nitrate pentahydrate was bought from Aladdin (China). Ethylene glycol was gotten from Tianjin Hengxing Chemical Reagent Co., Ltd. All materials are analytical reagent, using without further purification. Ultra-pure water was homemade by YL-100BD (ELION).

### **2. Preparation of materials**

#### **Preparation of $\text{Bi}_2\text{WO}_6$**

$\text{Bi}_2\text{WO}_6$  was prepared by hydrothermal method. Firstly, 2.5 mmol of  $\text{Na}_2\text{WO}_4 \cdot 2\text{H}_2\text{O}$  and 1.25 mmol of  $\text{Bi}(\text{NO}_3)_3 \cdot 5\text{H}_2\text{O}$  were dissolved in 15 ml of deionized water and stirred for 10 min, respectively. Then,  $\text{Na}_2\text{WO}_4 \cdot 2\text{H}_2\text{O}$  solution was added to  $\text{Bi}(\text{NO}_3)_3 \cdot 5\text{H}_2\text{O}$  solution and stirred for 30 min. Finally, the mixed solution was transferred into a 50 ml Teflon-lined stainless steel autoclave, sealed and kept at  $180^\circ\text{C}$  for 12 h. The obtained yellowish precipitation was washed with deionized water three times and dried at  $60^\circ\text{C}$  for 12 h to obtain  $\text{Bi}_2\text{WO}_6$ .

#### **Preparation of $\text{WO}_3/\text{Bi}_2\text{WO}_6$**

$\text{WO}_3/\text{Bi}_2\text{WO}_6$  was prepared through a cation exchange method. Typically, 0.53g  $\text{Na}_2\text{WO}_4 \cdot 2\text{H}_2\text{O}$  was dissolved in 14 ml of ultra-pure water, 1ml ethylene glycol was added, and the mixture was stirring for 10 minutes. Then, 3 ml nitric acid was dropped into the above solution, bright yellow sediment was obtained after stirring 4 hours. Subsequently, the precipitate was washed with the ultra-pure water 6 times to ensure neutrality. The as-prepared deposit was dispersed into 20ml of ultra-pure water, adding a certain amount of  $\text{Bi}(\text{NO}_3)_3 \cdot 5\text{H}_2\text{O}$  with stirring for 30 minutes. Finally, the above mixture was placed into a Teflon-lined stainless steel autoclave (50 ml), sealed and maintained at  $180^\circ\text{C}$  for 12 hours. The product was washed with ultra-pure water and dried at  $60^\circ\text{C}$  for 12 hours. The prepared samples are labeled as WB-x,  $\text{WO}_3$  were synthesized using same method without adding  $\text{Bi}^{3+}$ . The detailed information is

shown in Table S1.

### **Preparation of Pt/WO<sub>3</sub>/Bi<sub>2</sub>WO<sub>6</sub>**

The Pt/WO<sub>3</sub>/Bi<sub>2</sub>WO<sub>6</sub> composites were prepared by photoreduction method. The details of the experiment are as follows: 0.2g composite WO<sub>3</sub>/Bi<sub>2</sub>WO<sub>6</sub> was dissolved in a mixture of 60 ml deionized water and 20 ml methanol, and placed in an ultrasonic cleaning machine for 15 minutes. And then, the mixed solution was placed on a magnetic stirrer and stirred for 5 minutes in the dark, continuously. After the solution was evenly mixed, 4ml 50mg/100ml chloroplatinic acid solution was added, xenon lamp was turned on, and the dark gray mixed solution was obtained under the 300 W xenon lamp to irradiate for 30 min. Finally, the mixed solution was filtered, washed and dried at 60°C for 4 h to generate Pt/WO<sub>3</sub>/Bi<sub>2</sub>WO<sub>6</sub>.

### **3. Characterization**

The crystallinity and purity of as-prepared samples were characterized by a powder X-ray diffractometer (XRD, RigakuD/max-2000) equipped with a Cu-K $\alpha$  radiation at a scanning rate of 10° min<sup>-1</sup> in the 2 $\theta$  range of 10-90°. The morphologies and microstructures characterizations were measured on the scanning electron microscopy (SEM, TESCAN MIRA3) and transmission electron microscopy (TEM, JEOL JEM-2100F). X-ray photoelectron spectroscopy measurement (XPS) was performed on a Thermo Scientific ESCA Lab 250 spectrometer which consists of a monochromatic Al K $\alpha$  as the X-ray source. All of the binding energies were calibrated by the C1 speak at 284.8 eV. UV-vis diffuse reflectance spectroscopy (UV-vis DRS) was carried out on an ultraviolet-visible spectrophotometer (UNICO 2800-A) with BaSO<sub>4</sub> was used as a reflectance standard. AUTOLAB electrochemical workstation (PGSTAT302N) with a conventional three-electrode cell was employed to measure the photoelectrochemical responses of as-prepared samples. A Pt wire and Ag/AgCl served as counter and the reference electrodes, respectively, and 0.5 M Na<sub>2</sub>SO<sub>4</sub> was used as supporting electrolyte in this system. The visible light source was provided by a 300 W Xenon lamp (Perfect Light PLS-SXE300). All of the electrochemical measurements were implemented at room temperature.

#### **4. Photocatalytic experiment**

The photocatalytic activity of as-prepared photocatalysts was evaluated by degradation of RhB dye under a 300W Xenon lamp. The details were as follows: 50 mg of photocatalyst was dispersed in a 5 mg/L of RhB solution (100 mL), the suspension was ultrasonic for five minutes and stirred in the dark for 30 min to insure a complete adsorption-desorption equilibrium. When lighting commences, 2 mL of solution was withdrawn and centrifuged at fixed time intervals, the absorbance of the solution was analyzed with a UV-vis spectrophotometer.

## Growth mechanism

**Fig. S1** SEM images of the various samples (a, g)  $\text{H}_2\text{WO}_4$ , (b, h) WB-1, (c, i) WB-2, (d, j) WB-3, (e, k) WB-4, (f, l)  $\text{Bi}_2\text{WO}_6$ .

Homologous heterojunction  $\text{WO}_3/\text{Bi}_2\text{WO}_6$  were synthesized by hydrothermal method using ethylene glycol as surface modifier. The specific growth mechanism of  $\text{WO}_3/\text{Bi}_2\text{WO}_6$  samples, with different  $\text{Bi}^{3+}$  content, was revealed by the scanning electron microscope (SEM), as shown in Fig.S1. The overall morphology of as-samples shows the spherical structures (Fig.S1 (a-f)). Partial enlarged drawing of corresponding samples is shown in Fig. S1 (g-l), whose spherical structure is composed of small flower pieces with uniform size. Careful analysis shows that with the increase of  $\text{Bi}^{3+}$  content, the petals become larger and denser, and the surface clusters become more crowded and closer. This phenomenon can be explained as: when  $\text{Bi}^{3+}$  are present in  $\text{H}_2\text{WO}_4$  system, which will insert into the  $[\text{WO}_6]$  layer of  $\text{H}_2\text{WO}_4$  to form  $[\text{Bi}_2\text{O}_2]^{2+}$  layer; with the prolonging of reaction time, more  $[\text{Bi}_2\text{O}_2]^{2+}$  will randomly link adjacent  $\text{H}_2\text{WO}_4$  in the system, which displays the overlap between sheets. Under hydrothermal conditions, the  $[\text{WO}_6]/[\text{Bi}_2\text{O}_2]$  structure will grow further to create  $\text{Bi}_2\text{WO}_6$  crystal phase. At the later stage, the dehydration of  $\text{H}_2\text{WO}_4$ , due to the lower concentration of  $\text{Bi}^{3+}$ , to form  $\text{WO}_3$ . The formation mechanism of  $\text{WO}_3/\text{Bi}_2\text{WO}_6$  is shown in Fig. S1. Thus, during the hydrothermal reaction, the  $[\text{OH}]$  are replaced by  $[\text{Bi}_2\text{O}_2]$ , the ion layer dissolves and recrystallizes to form the composite heterojunction with continuous transition of two-phase grain boundaries.

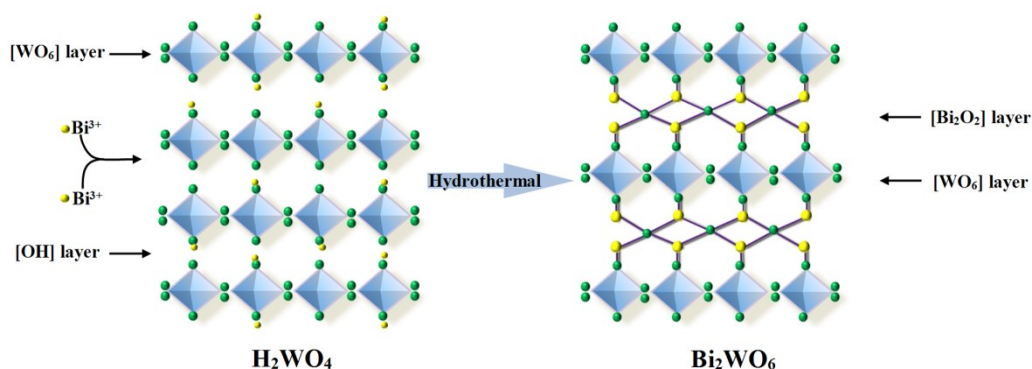

**Fig. S2** The growth schematic structure of WBs.

The  $\text{Bi}^{3+}$  in the system is inserted into the  $[\text{WO}_6]$  layer of  $\text{H}_2\text{WO}_4$  to form the  $[\text{Bi}_2\text{O}_2]^{2+}$  layer, and the  $[\text{Bi}_2\text{O}_2]^{2+}$  is randomly connected to the adjacent  $\text{H}_2\text{WO}_4$ . Moreover, the  $[\text{WO}_6]/[\text{Bi}_2\text{O}_2]$  structure grows up, to generate  $\text{Bi}_2\text{WO}_6$  crystal phase and remaining  $\text{H}_2\text{WO}_4$  dehydrates to form  $\text{WO}_3$  in the system. Therefore, during the hydrothermal reaction, the  $[\text{OH}]$  are replaced by  $[\text{Bi}_2\text{O}_2]$ , the ion layer dissolves and recrystallizes to form the composite heterojunction with continuous transition of two-phase grain boundaries.

**Fig. S3** The SEM images of (a)  $\text{Bi}_2\text{WO}_6$  and (b) WB-3.

Fig. S3 shows that the lamellar structure of the surface of  $\text{Bi}_2\text{WO}_6$  is much larger than that of the composite sample WB-3, and the gap between the sheets is more obvious. This may be due to the  $\text{WO}_3$  transformed in-situ on the surface of  $\text{Bi}_2\text{WO}_6$  and recrystallized. Under high temperature and high pressure,  $\text{WO}_3$  and  $\text{Bi}_2\text{WO}_6$  couple to form a three-dimensional hierarchical structure, with large specific surface area and more adsorption sites, which is helpful to improve the catalytic activity of photocatalytic materials.

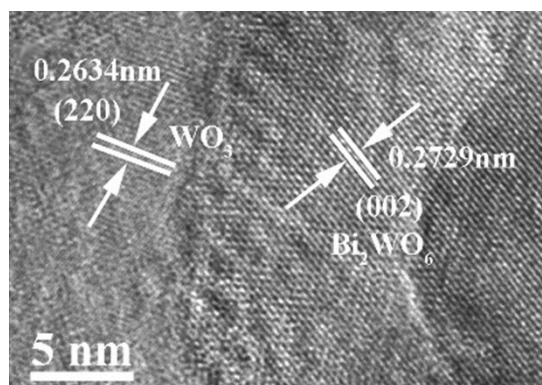

**Fig. S4** The HRTEM images of WB-3 sample.

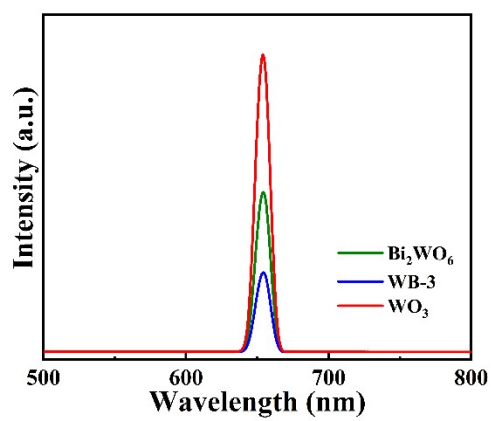

**Fig. S5** (a) Steady-state PL spectra



**Fig. S6** (a) Recycled photodegradation of RhB over WB-3, (b) XRD

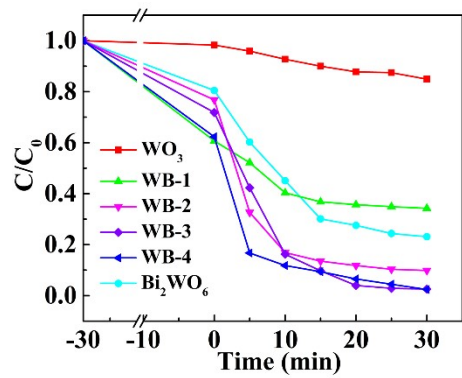

**Fig. S7** Degradation TC curves of the prepared samples under visible light irradiation.

**Table S1.** The short name of synthesized samples with different synthesis condition

| sample | Condition | lable |
|--------|-----------|-------|
|--------|-----------|-------|

|   | NaWO <sub>4</sub> ·H <sub>2</sub> O(g) | Bi(NO <sub>3</sub> ) <sub>3</sub> ·5H <sub>2</sub> O(g) | HNO <sub>3</sub> (ml) | Ethylene glycol(ml) |                                 |
|---|----------------------------------------|---------------------------------------------------------|-----------------------|---------------------|---------------------------------|
| 1 | 0.53                                   | 0                                                       | 3                     | 1                   | WO <sub>3</sub>                 |
| 2 | 0.53                                   | 0.388                                                   | 3                     | 1                   | WB-1                            |
| 3 | 0.53                                   | 0.776                                                   | 3                     | 1                   | WB-2                            |
| 4 | 0.53                                   | 0.97                                                    | 3                     | 1                   | WB-3                            |
| 5 | 0.53                                   | 1.164                                                   | 3                     | 1                   | WB-4                            |
| 6 | 0.4123                                 | 1.2127                                                  | 0                     | 0                   | Bi <sub>2</sub> WO <sub>6</sub> |

**Table S2.** XPS data of WO<sub>3</sub>, Bi<sub>2</sub>WO<sub>6</sub>, and WB-3.

|                                 | O 1s<br>(eV) | W 4f<br>(eV) | Bi 4f<br>(eV) | VB<br>(eV) | O<br>(%) | W<br>(%) | Bi<br>(%) |
|---------------------------------|--------------|--------------|---------------|------------|----------|----------|-----------|
| WO <sub>3</sub>                 | 530.4        | 35.6         | -             | 2.68       | 40.83    | 5.36     | -         |
|                                 | 531.4        | 37.8         |               |            |          |          |           |
| WB-3                            | 529.3        | 35.9         | 159.1         | -          | 44.17    | 7.78     | 5.43      |
|                                 | 531.4        | 38.1         | 164.5         |            |          |          |           |
| Bi <sub>2</sub> WO <sub>6</sub> | 529.3        | 35.6         | 159.4         | 1.66       | 30.39    | 8.22     | 16.27     |
|                                 | 530.2        | 37.8         | 164.7         |            |          |          |           |
|                                 | 531.4        |              |               |            |          |          |           |

**Table S3.** The corresponding report of Bi<sub>2</sub>WO<sub>6</sub>, WO<sub>3</sub> and composite photocatalysts for RhB degradation

| Photocatalysts | RhB<br>(mg/L) | Time<br>(min) | Dosage<br>(ml/mg) | Light<br>Source | Efficiency<br>(%) | Refs. |
|----------------|---------------|---------------|-------------------|-----------------|-------------------|-------|
|----------------|---------------|---------------|-------------------|-----------------|-------------------|-------|

|                                                                               |    |     |         |                                      |        |           |
|-------------------------------------------------------------------------------|----|-----|---------|--------------------------------------|--------|-----------|
| $\text{Bi}_2\text{S}_3@\text{Bi}_2\text{WO}_6/\text{WO}_3$                    | 20 | 180 | 30/30   | UV filter 400 W<br>Xe-lamp           | 96 %   | [1]       |
| $\text{Bi}_2\text{WO}_6@\text{BiOI}$                                          | 24 | 300 | 100/100 | UV filter 500 W<br>Xe-lamp           | 100 %  | [2]       |
| $\text{Bi}_2\text{WO}_6/\text{BiOI}$                                          | 10 | 120 | 40/40   | UV filter 300 W<br>Xe-lamp           | 100 %  | [3]       |
| $\text{WO}_3/\text{Bi}_2\text{WO}_6$                                          | 24 | 180 | 100/100 | UV filter 400 W<br>metal halide lamp | 100 %  | [4]       |
| $\text{BiOBr}/\text{Bi}_2\text{WO}_6$                                         | 24 | 60  | 150/150 | Xe-lamp                              | 97.5 % | [5]       |
| $\text{Bi}_2\text{WO}_6$ -Phosphate                                           | 10 | 60  | 100/50  | UV filter 400 W<br>metal halide lamp | 100 %  | [6]       |
| $\text{Ag}/\text{Ag}_2\text{O}/\text{Ag}_3\text{PO}_4/\text{Bi}_2\text{WO}_6$ | 5  | 60  | 100/50  | 500 W<br>Light-lamp                  | 99.9 % | [7]       |
| $\text{Bi}_2\text{WO}_6$                                                      | 10 | 100 | 50/50   | Xe-lamp                              | 70 %   | [8]       |
| WB-3                                                                          | 5  | 15  | 100/50  | 300 W Xe-lamp                        | 99.5 % | This work |

**Table S4.** BET surface areas of the prepared samples

| Samples                                       | $\text{WO}_3$ | WB-1  | WB-2  | WB-3  | WB-4  | $\text{Bi}_2\text{WO}_6$ |
|-----------------------------------------------|---------------|-------|-------|-------|-------|--------------------------|
| BET Surface Area<br>( $\text{m}^2/\text{g}$ ) | 1.59          | 61.75 | 27.58 | 27.14 | 36.11 | 16.31                    |

## 参考文献

- (1) Fabrication of  $\text{Bi}_2\text{S}_3@\text{Bi}_2\text{WO}_6/\text{WO}_3$  ternary photocatalyst with enhanced photocatalytic performance: synergistic effect of Z-scheme/traditional heterojunction and oxygen vacancy
- (2) Hierarchical BiOI and hollow  $\text{Bi}_2\text{WO}_6$  microspheres: Topochemical conversion and photocatalytic activities
- (3) Insight into visible light-driven photocatalytic performance of direct Z-scheme  $\text{Bi}_2\text{WO}_6/\text{BiOI}$  composites constructed in -situ
- (4) One-step hydrothermal preparation strategy for nanostructured  $\text{WO}_3/\text{Bi}_2\text{WO}_6$  heterojunction with high visible light photocatalytic activity

- ( 5 ) Microwave-hydrothermal synthesis of BiOBr/Bi<sub>2</sub>WO<sub>6</sub> nanocomposites for enhanced photocatalytic performance
- ( 6 ) Doping effect of phosphate in Bi<sub>2</sub>WO<sub>6</sub> and universal improved photocatalytic activity for removing various pollutants in water
- ( 7 ) Polyethylene glycol (PEG)-modified Ag/Ag<sub>2</sub>O/Ag<sub>3</sub>PO<sub>4</sub>/Bi<sub>2</sub>WO<sub>6</sub> photocatalyst film with enhanced efficiency and stability under solar light
- ( 8 ) Spiral carbon fibers modified Bi<sub>2</sub>WO<sub>6</sub> with enhanced photocatalytic activity
